# Supplementary material
Source: publisher site journal article supplement (https://static.cambridge.org/content/id/urn:cambridge.org:id:article:S0007114521004682/resource/name/S0007114521004682supp001.pdf)
Supplement: Supplementary file 1 [file S0007114521004682supp001.pdf]

# Associations between dietary patterns and metabolic syndrome in older adults in New Zealand: the REACH study.

Supplementary Table 1: Grouping of REACH FFQ food items into food groups for dietary pattern analysis

| Food groups ( <i>n</i> 57) | Food items ( <i>n</i> 109)                                                                                                                                                                                                                                                                                                                       |
|----------------------------|--------------------------------------------------------------------------------------------------------------------------------------------------------------------------------------------------------------------------------------------------------------------------------------------------------------------------------------------------|
| Beer                       | Beer, lager, cider (all varieties)                                                                                                                                                                                                                                                                                                               |
| Other alcohol              | Port, sherry, liquors; ready to drink alcoholic beverages; spirits e.g., gin, brandy, whiskey, vodka; white wine                                                                                                                                                                                                                                 |
| Red wine                   | Red wine                                                                                                                                                                                                                                                                                                                                         |
| Bran cereal                | Bran based cereals, muesli, porridges – e.g., rolled oats, oat bran, oatmeal, All Bran, Sultana bran                                                                                                                                                                                                                                             |
| Refined grains             | White bread and rolls including sliced and specialty breads such as foccacia, panini, pita, naan, chapatti, ciabatta, Turkish, English muffin, crumpets, pizza bases, wraps, tortilla's, burrito, roti, rewena bread; white pasta, noodles e.g., spaghetti, canned spaghetti, vermicelli, egg noodles, rice noodles, instant noodles; white rice |
| Snacks                     | Crackers e.g., crisp bread, water crackers, rice cakes, cream crackers, Cruskits, Mealmates, vitawheat; muesli or cereal bar (all varieties)                                                                                                                                                                                                     |
| Sweetened cereals          | Other breakfast cereals e.g., Special K, Light and tasty; sweetened cereals e.g., Nutrigrain, Fruit Loops, Honey Puffs, Frosties, Milo cereal, CocoPops; Weetbix, cornflakes or rice bubbles                                                                                                                                                     |
| Whole grains               | Brown rice; couscous, polenta, congee, Bulgur wheat, quinoa e.g., tabbouleh; whole grain or multigrain bread and rolls including sliced and specialty breads; wholemeal or wheatmeal bread and rolls including sliced and specialty breads; wholemeal pasta, noodles                                                                             |
| Cheese                     | Cheese e.g., Cheddar, Colby, Edam, Tasty, blue vein, camembert, parmesan, gouda, feta, mozzarella, brie, processed; cottage cheese, ricotta cheese                                                                                                                                                                                               |
| Creamy dairy               | Cream, sour cream, cream cheese, cheese spreads                                                                                                                                                                                                                                                                                                  |
| Milk                       | Cow's milk including milk as a drink, milk added to drinks (e.g., milky coffees), milk added to cereal                                                                                                                                                                                                                                           |
| Other milks (non-dairy)    | Soy milk, coconut milk, rice milk, almond milk                                                                                                                                                                                                                                                                                                   |
| Sweetened dairy products   | Ice cream; milk-based puddings e.g., rice pudding, custard, semolina, instant puddings, dairy food; smoothies, milk shakes (made from milk, yoghurt, ice cream), flavoured milk                                                                                                                                                                  |
| Yoghurt                    | Yoghurt                                                                                                                                                                                                                                                                                                                                          |

| Food groups ( <i>n</i> 57)    | Food items ( <i>n</i> 109)                                                                                                                                                                                                                                     |
|-------------------------------|----------------------------------------------------------------------------------------------------------------------------------------------------------------------------------------------------------------------------------------------------------------|
| Dried legumes                 | Beans (canned or dried) e.g., black beans, butter beans, haricot beans, kidney beans, cannellini beans, refried beans, baked beans, chilli beans; peas and lentils e.g., chickpeas, hummus, falafels, split peas, cow peas, dahl                               |
| Eggs                          | Eggs – boiled, poached, raw; eggs - fried, scrambled, egg-based dishes including quiche, soufflés, frittatas, omelettes                                                                                                                                        |
| Nuts, seeds                   | Nut butters or spreads e.g., peanut butter, almond butter, pesto; nuts e.g., peanuts, mixed nuts, macadamias, pecan, hazelnuts, brazil nuts, walnuts, cashews, pistachios, almonds; seeds e.g., pumpkin seeds, sunflower seeds, pinenuts, sesame seeds, tahini |
| Soy-based foods               | Tofu, soybeans, tempeh, vegetarian sausages / meat, vegetarian burger patty, textured vegetable protein                                                                                                                                                        |
| Oily fish                     | Albacore tuna, salmon, sardines, herring, kahawai, swordfish, carp, dogfish, gemfish, alfonsino, rudderfish, anchovies; mackerel, snapper, oreo, barracouta, trevally, dory, trout, eel                                                                        |
| Processed fish                | Crumbed fish e.g., patties, cakes, fingers, nuggets; fish fried in batter (from fish & chips shop)                                                                                                                                                             |
| White fish, shellfish         | Green mussels, squid; shellfish e.g., cockles, kina, oysters, paua, scallops, shrimp/prawn, pipi, roe; tuna (canned), hoki, gurnard, hake, kingfish, cod, tarakihi, groper, flounder                                                                           |
| Apples, pears                 | Apples, pears, nashi pears                                                                                                                                                                                                                                     |
| Avocados, olives              | Avocado; olives                                                                                                                                                                                                                                                |
| Bananas                       | Banana                                                                                                                                                                                                                                                         |
| Berries                       | Strawberries, blackberries, cherries, blueberries, boysenberries, loganberries, cranberries, gooseberries, raspberries (fresh, frozen, canned)                                                                                                                 |
| Citrus fruit                  | Citrus fruits e.g., orange, tangelo, tangerine, mandarin, grapefruit, lemon, lime                                                                                                                                                                              |
| Dried fruit                   | Dried fruit e.g., sultanas, raisins, currants, figs, apricots, prunes, dates                                                                                                                                                                                   |
| Other fruit                   | All other fruit e.g., feijoa, persimmon, tamarillo, kiwifruit, grapes, mango, melon, watermelon, pawpaw, papaya, pineapple, rhubarb                                                                                                                            |
| Stone fruit                   | Stone fruit e.g., apricots, nectarines, peaches, plums, lychees                                                                                                                                                                                                |
| Poultry                       | Chicken, turkey, or duck e.g., roast, steak, fried, steamed, BBQ, casserole, stew, stir fry, curry, mince dishes, frozen dinners                                                                                                                               |
| Processed meat                | Corn beef (canned), boil up <sup>a</sup> , pork bones, lamb flaps, povi masima <sup>b</sup> ; ham, bacon, luncheon sausage, salami, pastrami, other processed meat; sausages, frankfurters, cheerios <sup>c</sup> , hot dogs                                   |
| Red meat                      | Beef, lamb, hogget, mutton, pork, veal e.g., roast, steak, fried, chops, schnitzel, silverside, casserole, stew, stir fry, curry, BBQ, hamburger meat, mince dishes, frozen dinners; liver, kidney, other offal (including pate)                               |
| Butter, coconut               | Butter, ghee; coconut cream; coconut oil                                                                                                                                                                                                                       |
| Cakes, biscuits, and puddings | Biscuits, chocolate or cream filled; biscuits, plain; cakes, slices, pastries; non-milk-based puddings e.g., pavlova, sweet pastries, fruit pies, trifle; pancakes, waffles, sweet buns, scones, sweet muffins, fruit bread, croissants, doughnuts, brioche    |

| Food groups ( <i>n</i> 57)   | Food items ( <i>n</i> 109)                                                                                                                                                                                            |
|------------------------------|-----------------------------------------------------------------------------------------------------------------------------------------------------------------------------------------------------------------------|
| Chocolate                    | Chocolate (all other varieties)                                                                                                                                                                                       |
| Confectionery                | Jam, marmalade, honey, syrups, sweet spreads or preserves; sugar (all varieties) added to food/drinks; sweets, lollies                                                                                                |
| Salad dressings              | Creamy dressings e.g., mayonnaise, tartar, thousand island, ranch dressing; light dressings e.g., French and Italian dressing, balsamic vinegar                                                                       |
| Meat pies, chips             | Hot potato chips, French fries, wedges; meat pies, sausage rolls; potato crisps                                                                                                                                       |
| Sauces, condiments           | Pickles, chutney, mustard; tomato sauce, barbeque sauce, sweet chilli sauce; white sauce, cheese sauce, gravies                                                                                                       |
| Soup                         | Soup, homemade or canned                                                                                                                                                                                              |
| Spices                       | Spices e.g., turmeric, ginger, cinnamon                                                                                                                                                                               |
| Vegetable oils               | Margarine; vegetable oils                                                                                                                                                                                             |
| Yeast spreads                | Marmite, vegemite                                                                                                                                                                                                     |
| Diet drinks                  | Diet soft/fizzy drinks e.g., Sprite Zero, Diet Coke, Coke Zero; low calorie cordials                                                                                                                                  |
| Juices                       | Fruit and vegetable juices (all varieties)                                                                                                                                                                            |
| Sugary drinks                | Cordials including syrups, powders e.g., Raro; energy drinks e.g., Red Bull, V; hot chocolate, drinking chocolate, Cocoa, Ovaltine, Nesquik, Milo; soft/fizzy drinks e.g., Sprite, Coke; sports drinks e.g., Powerade |
| Tea, coffee                  | Coffee (all varieties); herbal tea, fruit tea; tea                                                                                                                                                                    |
| Water                        | Water including tap, bottled or sparkling water                                                                                                                                                                       |
| Alliums                      | Onions, leeks, garlic                                                                                                                                                                                                 |
| Carrots                      | Carrots                                                                                                                                                                                                               |
| Cruciferous vegetables       | Broccoli, cauliflower, Brussel sprouts, cabbage (all varieties)                                                                                                                                                       |
| Fresh, frozen legumes        | Green beans, broad beans, runner beans; peas, green                                                                                                                                                                   |
| Leafy cruciferous vegetables | Green leafy vegetables e.g., spinach, silver beet, swiss chard, watercress, puha, whitloof, chicory, kale, chard, collards, Chinese kale, bok choy, taro leaves (palusami)                                            |
| Other vegetables             | All other vegetables e.g., corn, pumpkin, mushrooms, capsicum, peppers, courgette, zucchini, gherkins, marrow, squash, asparagus, radish, eggplant, artichoke                                                         |
| Root vegetables              | Kumara, taro, green banana, cassava e.g., boiled, mashed, baked, roasted; other root vegetables e.g., yams, parsnip, swedes, beetroot, turnips; potato e.g., boiled, mashed, baked, jacket, instant, roasted          |
| Salad vegetables             | Salad vegetables e.g., lettuce, cucumber, celery, sprouts                                                                                                                                                             |
| Tomatoes                     | Tomatoes (all varieties)                                                                                                                                                                                              |

FFQ, food frequency questionnaire; REACH, Researching Eating, Activity, and Cognitive Health

<sup>a</sup> traditional Māori food consisting of boiled meat and vegetables

<sup>b</sup> brined beef brisket

<sup>c</sup> processed sausage

Supplementary Table 2: Factor loadings<sup>a, b</sup> for three major dietary patterns identified from the REACH food frequency questionnaire using principal component analysis (n 367)

| Food groups (n 57)            | Mediterranean style | Prudent     | Western     |
|-------------------------------|---------------------|-------------|-------------|
| Salad vegetables              | <b>0.64</b>         |             |             |
| Leafy cruciferous vegetables  | <b>0.57</b>         | 0.23        |             |
| Other vegetables              | <b>0.56</b>         |             |             |
| Avocados, olives              | <b>0.51</b>         |             |             |
| Alliums                       | <b>0.47</b>         | 0.15        |             |
| Nuts, seeds                   | <b>0.45</b>         | 0.26        |             |
| White fish, shellfish         | <b>0.45</b>         |             |             |
| Oily fish                     | <b>0.42</b>         |             |             |
| Berries                       | <b>0.41</b>         |             |             |
| Water                         | <b>0.40</b>         | 0.18        | -0.16       |
| Salad dressings               | <b>0.39</b>         | -0.18       | <b>0.35</b> |
| Cruciferous vegetables        | <b>0.39</b>         | 0.24        |             |
| Eggs                          | <b>0.34</b>         |             |             |
| Cheese                        | <b>0.33</b>         | -0.18       | <b>0.34</b> |
| Tomatoes                      | <b>0.33</b>         |             |             |
| All other fruit               | <b>0.32</b>         | 0.22        |             |
| Dried legumes                 | 0.15                | <b>0.68</b> |             |
| Soy-based foods               |                     | <b>0.65</b> |             |
| Fresh, frozen legumes         |                     | <b>0.54</b> | 0.20        |
| Whole grains                  |                     | <b>0.51</b> | 0.24        |
| Carrots                       | 0.28                | <b>0.48</b> |             |
| Spices                        | 0.23                | <b>0.30</b> |             |
| Processed meats               |                     | -0.29       | <b>0.59</b> |
| Sauces, condiments            | 0.23                |             | <b>0.52</b> |
| Cakes, biscuits, and puddings | -0.26               |             | <b>0.51</b> |
| Meat pies, chips              | -0.28               |             | <b>0.47</b> |
| Processed fish                |                     |             | <b>0.41</b> |
| Confectionery                 | -0.22               |             | <b>0.39</b> |
| Vegetable oils                |                     |             | <b>0.36</b> |
| Beer                          |                     | -0.21       | <b>0.35</b> |
| Chocolate                     |                     |             | <b>0.35</b> |
| Sweetened cereal              | -0.19               |             | <b>0.30</b> |
| Stone fruit                   | 0.29                |             | 0.18        |

| Food groups ( <i>n</i> 57)  | Mediterranean style | Prudent       | Western       |
|-----------------------------|---------------------|---------------|---------------|
| Apples, pears               | 0.26                | 0.28          |               |
| Dried fruit                 | 0.23                | 0.25          |               |
| Butter, coconut             | 0.23                | -0.20         |               |
| Yoghurt                     | 0.19                | 0.16          |               |
| Root vegetables             | 0.17                | 0.29          | 0.24          |
| Red wine                    | 0.15                | -0.27         | 0.16          |
| Refined grains              |                     | 0.29          | 0.21          |
| Other milks (non-dairy)     |                     | 0.28          |               |
| Poultry                     |                     | 0.21          | 0.15          |
| Citrus fruit                |                     | 0.21          |               |
| Bran cereal                 |                     | 0.20          |               |
| Bananas                     |                     | 0.17          |               |
| Tea, coffee                 |                     | -0.21         | 0.21          |
| Other alcohol               |                     | -0.21         |               |
| Red meat                    |                     |               | 0.29          |
| Diet drinks                 |                     |               | 0.28          |
| Sugary drinks               |                     |               | 0.25          |
| Milk                        |                     |               | 0.25          |
| Snacks                      |                     |               | 0.24          |
| Sweetened dairy products    |                     |               | 0.20          |
| Yeast spreads               |                     |               |               |
| Creamy dairy                |                     |               |               |
| Juices                      |                     |               |               |
| Soup                        |                     |               |               |
| Dietary pattern score range | -2.32 to 4.26       | -2.49 to 8.31 | -1.93 to 3.82 |
| Variance explained %        | 7.20                | 5.30          | 5.60          |
| Eigenvalue                  | 4.12                | 3.04          | 3.18          |

REACH, Researching Eating, Activity and Cognitive Health

<sup>a</sup> Loadings between 0.15 and -0.15 excluded for ease in presentation. **Loadings in bold**  $\geq 30$  are considered significant

<sup>b</sup> Positive loadings are positively associated, and negative loadings are negatively associated with the dietary pattern - a higher loading indicates a greater contribution to the dietary pattern.
